1 **Effectiveness of Financial Incentives for a Pedometer-Based Walking Promotion Program**

2

3

4 **Short title:**

5 **The effect on health care costs of a municipal-level program**

6

7

8

9 Eriko Komiya<sup>1</sup>, Satsuki Taniuchi<sup>2</sup>, Masatsugu Shiba<sup>3</sup>, Ayumi Shintani<sup>2</sup>, Hiroaki Nakamura<sup>1</sup>

10

11

12 <sup>1</sup> Department of Orthopedic Surgery, Osaka City University Graduate School of Medicine,

13 Osaka, Japan.

14 <sup>2</sup> Department of Medical Statics, Osaka City University Graduate School of Medicine, Osaka,

15 Japan.

16 <sup>3</sup> Health Science Innovation Center, Osaka City University, Osaka, Japan

17

18 Corresponding author

19 E-mail: [d18mb017@xr.osaka-cu.ac.jp](mailto:d18mb017@xr.osaka-cu.ac.jp) (EK)

20  
21  
22  
23  
24  
25  
26  
27  
28  
29  
30  
31  
32  
33  
34  
35  
36

## Abstract

Physical inactivity contributes significantly to poor health and the onset of disease. Physical inactivity is also associated with severe economic burdens. Japan’s Ministry of Health, Labor and Welfare (MHLW) cites the provision of various health promotion incentives aimed at health-indifferent groups, which are made up of individuals less interested in health promotion. This study investigated the relationship between medical costs and a pedometer-based walking program providing monetary incentives based on daily step counts. The study sample included 16,816 citizens aged 40–75 years who lived in Takaishi City and were enrolled in the NIH from October 2016 to March 2018. The results of the ordinal logistic regression analysis showed that participation in a walking promotion program with an HPFI was correlated with a reduction in healthcare costs over 1 year in a sample of Takaishi City residents. In fact, there was a difference of 67,077 yen in the average medical cost per person per year between the walking and control groups. With 1,923 walking group participants, the total medical cost reduction was predicted to be at least 12,898,904 yen. In this study, we evaluated the effectiveness of a walking promotion program with incentives. With program context differing widely from region to region and country to country, future investigations are needed to inform the selection of appropriate incentive schemes for programs offered in other regions and countries.

37  
38

## Introduction

39  
40  
41  
42

Physical inactivity contributes significantly to poor health and the onset of disease. According to the World Health Organization, the lack of exercise is the fourth leading cause of mortality risk, and increasing exercise is expected to improve other disorders, such as hypertension, dyslipidemia, and obesity.[1] Physical inactivity is also associated with severe

43 economic burdens.[2] In fact, the authors reported that physical inactivity generates costs of  
44 USD 53.8 billion internationally, most of which are paid by the public sector. [2]

45 Japan's Ministry of Health, Labor and Welfare (MHLW) cites the provision of various  
46 health promotion incentives aimed at *health-indifferent groups*, which are made up of individuals  
47 less interested in health promotion.[8] Giles et al. reviewed the literature on the effectiveness of  
48 financial incentive interventions in promoting healthy behavior changes among nonclinical  
49 adults living in high-income countries.[3] Their results indicated that interventions with financial  
50 incentives are more effective in promoting healthy behavior changes compared to usual care or  
51 no intervention.[3] Although pedometers have been shown to be effective in promoting activities  
52 of daily living in a wide range of age groups, most reported studies were conducted on  
53 hospitalized patients, with few including nonclinical adult populations.[4,5,6] Currently, there is  
54 insufficient research on the effects of municipal-level programs that distribute pedometers to  
55 citizens (including healthy individuals), evaluate their level of activity, and provide incentives  
56 according to the amount of walking completed. Therefore, this study investigated the relationship  
57 between medical costs and a pedometer-based walking program providing monetary incentives  
58 based on daily step counts.

## 59 **Materials and Methods**

60 This study used data from a program that provided incentives for daily steps measured by  
61 pedometers, implemented from October 2016 to March 2018 in Takaishi City in Osaka  
62 Prefecture. The program aimed to promote longevity by encouraging people to start and continue  
63 exercising. The program was offered not only to health-conscious individuals but also to those  
64 who were either indifferent to health promotion or did not exercise much in their daily lives.

65 The city's program was widely publicized through information distributed to all resident

66 homes, the city's website, and posters around the city. Located in an industrial area of Osaka, the  
67 city has a population of 56,000, of which 27% is older than 65 years. Takaishi city residents who  
68 wished to participate in the walking program were required to register at the city office, where  
69 they received a pedometer (Activity Meter with FeliCa AM-150; Tanita Corp., Tokyo, Japan).  
70 Participants could also use the pedometer application on their smartphones.

71 At their convenience, participants registered their daily step data by bringing their  
72 pedometers to special machines installed at community centers, post offices, and stores  
73 throughout the city. Depending on the number of steps taken each day, up to 6,000 points were  
74 awarded over the course of a year (one point equaling JPY1), which could be exchanged for gift  
75 certificates. As there is no private medical insurance in Japan, every resident is required to enroll  
76 in one of two public health insurance systems.[6,7] This study used a claims data set from one of  
77 these systems, the National Health Insurance (NIH), which covers self-employed people (e.g.,  
78 farmers and fishermen), retirees and their dependents, and the remaining 25% of the population.  
79 This data set included the following information: ID number, the month in which domestic  
80 diagnosis codes were assigned in each hospital or clinic, whether claims were inpatient or  
81 outpatient, whether the claims were medical or DPC claims (medical claims form), the number  
82 of days per month medical treatments were provided, domestic diagnosis codes (mapped to the  
83 10th Revision of the International Statistical Classification of Diseases and Related Health  
84 Problems), and the medical fees scale (medical expenses). These data were selected in  
85 compliance with rules governing the use of personal information and then prepared for analyses.  
86 Each individual was given a temporary ID (standardized for medical cost and pedometer data)  
87 that was used to link same individuals during analyses. Individuals with registered step count  
88 data were considered program participants, whereas those without such data were not considered

89 participants. The daily step data were used for analyses, and the first month with registered step  
90 data was considered the first month of program participation. This research protocol was  
91 approved by the Ethics Committee of the Osaka City University School of Medicine.

## 92 **Analyses**

93 This study was designed to assess the impacts that the program participation had on  
94 healthcare costs. When setting up the control and walking groups, attention needed to be paid to  
95 factors other than program participation that could affect medical costs in both groups. In this  
96 case, there was no data on factors that might be expected to affect the outcome (i.e., medical  
97 history, smoking history, body mass index, etc.). Therefore, to adjust for the background factors  
98 affecting healthcare costs of the walking and control groups, we adopted a method to reduce bias  
99 as much as possible: determining each participant's basic monthly medical expenses (baseline  
100 medical expenses) at the time of the program participation. Baseline medical expenses were  
101 defined as the monthly average of medical expenses for 6 months after the program's starting  
102 point. When setting up the control group, age and baseline medical expenses were divided into 5-  
103 year and JPY-5,000 categories, respectively. Nonparticipating individuals with the same data  
104 (month and year), gender, age category, and baseline medical expense category as the control  
105 group were selected on a one-to-one basis. An ordinal logistic analysis was conducted on  
106 medical costs during the first 12 months of participation, with the dependent variable of medical  
107 costs and the independent variables of program participation, gender, age, time elapsed since  
108 participation, and baseline medical costs. A two-sided 5% significance level was used for all  
109 hypothesis tests. R version 4.0.1 (<https://www.r-project.org/foundation/>) was used for analyses.

## 110 **Results**

111 Table 1 shows a summary of the descriptive statistical analyses. The study sample

112 included 16,816 citizens aged 40–75 years who lived in Takaishi City and were enrolled in the  
113 NIH from October 2016 to March 2018. The sample had an average age of 64.0 years and was  
114 55% female. The median average cost was 42,865 yen, and 1,923 people (16.6%) participated in  
115 the program.

116

**Table 1** Characteristics of the study sample

|                                            |        |                          |
|--------------------------------------------|--------|--------------------------|
| Total number                               |        | 11560                    |
| Age (median [IQR])                         |        | 64.00 [51.00, 69.00]     |
| Sex ,% (freq)                              | Female | 55.1 (6375)              |
|                                            | Male   | 44.9 (5185)              |
| Baseline cost , (yen/month) (median [IQR]) |        | 4286.50 [0.00, 13019.50] |
| Project participants ,% (freq)             | No     | 83.4 (9637)              |
|                                            | Yes    | 16.6 (1923)              |

117

118

119 One control person with the same background factors was selected for each participant, and the  
120 number of subjects analyzed is shown in Table 2. There were no significant demographic  
121 differences between the walking and control groups.

**Table 2** Demographic data for walking group and matched control group

|                                      |              | Walking     | Control     | Overall     | p Value* |
|--------------------------------------|--------------|-------------|-------------|-------------|----------|
| N                                    |              | 1778        | 1819        | 3597        |          |
| Sex % (freq)                         | Female       | 68.9 (1398) | 68.6 (1421) | 68.8 (2819) | 0.842    |
|                                      | Male         | 31.1 ( 631) | 31.4 ( 649) | 31.2 (1280) |          |
| Age Categories(years old) ,% (freq)  | "40-44"      | 9.3 ( 189)  | 11.1 ( 230) | 10.2 ( 419) | 0.73     |
|                                      | "45-49"      | 9.6 ( 195)  | 9.4 ( 195)  | 9.5 ( 390)  |          |
|                                      | "50-55"      | 8.2 ( 166)  | 8.0 ( 166)  | 8.1 ( 332)  |          |
|                                      | "55-59"      | 8.7 ( 176)  | 8.5 ( 176)  | 8.6 ( 352)  |          |
|                                      | "60-64"      | 12.8 ( 259) | 12.5 ( 259) | 12.6 ( 518) |          |
|                                      | "65-69"      | 25.9 ( 526) | 25.4 ( 526) | 25.7 (1052) |          |
|                                      | "70-75"      | 25.5 ( 518) | 25.0 ( 518) | 25.3 (1036) |          |
| Cost Categories(yen/month) ,% (freq) | "0-4999"     | 58.9 (1195) | 59.7 (1235) | 59.3 (2430) | 0.999    |
|                                      | "5000-9999"  | 7.9 ( 161)  | 7.8 ( 161)  | 7.9 ( 322)  |          |
|                                      | "1000-1499"  | 7.4 ( 150)  | 7.3 ( 151)  | 7.3 ( 301)  |          |
|                                      | "1500-1999"  | 5.9 ( 119)  | 5.7 ( 119)  | 5.8 ( 238)  |          |
|                                      | "20000-2499" | 4.2 ( 85)   | 4.1 ( 85)   | 4.1 ( 170)  |          |
|                                      | "2500-2999"  | 3.4 ( 68)   | 3.3 ( 68)   | 3.3 ( 136)  |          |
|                                      | "30000-"     | 12.4 ( 251) | 12.1 ( 251) | 12.2 ( 502) |          |

\*Comparison between walking and control groups.

122

123

124 Figure 1 shows the program participants' step registration rate. Results showed that 86.4% of the  
 125 participants registered their steps for more than 80% of the days in the registration period. Figure  
 126 2 and Table 3 shows the results of the ordinal logistic analysis, which indicated that participating  
 127 in a program with a health-promoting financial incentive (HPFI) was associated with a reduction  
 128 in healthcare costs over a 12-month period.

**Table 3** Results of ordinal logistic analysis

| Period (month) | Estimate | Lower | Upper | P      |
|----------------|----------|-------|-------|--------|
| 1              | 0.871    | 0.761 | 0.998 | 0.046  |
| 2              | 0.864    | 0.756 | 0.986 | 0.031  |
| 3              | 0.806    | 0.704 | 0.922 | 0.002  |
| 4              | 0.733    | 0.643 | 0.835 | <0.001 |
| 5              | 0.77     | 0.676 | 0.878 | <0.001 |
| 6              | 0.724    | 0.637 | 0.823 | <0.001 |
| 7              | 0.75     | 0.658 | 0.854 | <0.001 |
| 8              | 0.804    | 0.706 | 0.916 | 0.001  |
| 9              | 0.786    | 0.688 | 0.897 | <0.001 |
| 10             | 0.73     | 0.641 | 0.831 | <0.001 |
| 11             | 0.812    | 0.713 | 0.925 | 0.002  |

129

130 The average medical costs per year was JPY 85,525.8 for the walking group and JPY 152,602.8  
131 for the control group (Table 4).

132

**Table 4** Average medical costs for 12 months

|                                | Walking | Control  |
|--------------------------------|---------|----------|
| N                              | 1778    | 1819     |
| Cost average (JPY/year/person) | 85525.8 | 152602.8 |

133

134

135

### Discussion

136

137

138

139

140

141

The results of the ordinal logistic regression analysis showed that participation in a walking promotion program with an HPFI was correlated with a reduction in healthcare costs over 1 year in a sample of Takaishi City residents. In fact, there was a difference of JPY 67,077 in the average medical cost per person per year between the walking and control groups. With 1,923 walking group participants, the total medical cost reduction was predicted to be at least JPY 12,898,904.

142

143

144

145

146

147

148

With a total of 2,848 program participants, a further reduction in medical costs was predicted for the population aged 20 years or older. Up to 6,000 yen per person per year were given back to citizens according to their daily step count. The average number of points given back was 20,659,200 yen per year, an amount much lower than the total projected medical cost reduction. These results indicate that a municipal program providing incentives of up to 6,000 yen per year based on the daily step count taken via pedometers can help reduce medical costs, with an effect greater than the number of points returned.

149

150

Indeed, previous studies have reported that HPFIs may be effective in promoting exercise.[9,10,17–19,21] Finkelstein et al. conducted a two-group, single-blind randomized



151 controlled trial to evaluate the effects of an HPFI that provided monetary incentives according to  
152 the number of aerobic exercise minutes recorded by a weekly pedometer over a 4-week period.  
153 The results showed that the incentive group had a higher level (1.7 times) of weekly exercise  
154 than the control group.[9] Therefore, the researchers concluded that linking a moderate monetary  
155 incentive to aerobic exercise minutes is an effective and potentially cost-effective approach to  
156 increasing physical activity.[9] Although that report had the advantage of using a randomized  
157 controlled design, it had a small sample size of only 51 subjects. In contrast, this study was  
158 conducted on a municipal scale and included 1,923 walkers in the analysis, a number larger than  
159 previous studies. Furthermore, incentive measures implemented by confirming manual step  
160 counts during face-to-face meetings with participants limited the number of people who can  
161 participate. To solve this issue, the city of Takaishi operated the program using a system based  
162 on information and communication technology. This automated system allowed participants to  
163 register their steps by bringing their pedometers to upload sites (registration terminals) set up  
164 throughout the city. This approach allowed many participants to be managed with a small  
165 number of staff.

166 The literature includes reports on other examples of HPFIs. Meta-regressions that include  
167 a wide variety of health promotion interventions have reported that the intervention effect may  
168 decrease with time after the intervention period ends.[9–11] However, statistically significant  
169 effects in a smoking cessation program persisted through the 6-month post-intervention follow-  
170 up, indicating that the withdrawal of the incentive did not result in a sudden decline in program  
171 effectiveness.[20] It has been suggested that HPFIs are more effective in promoting simple, one-  
172 time behaviors (e.g., vaccination) rather than complex, sustained behaviors.[12–14] Indeed, there  
173 is concern that an HPFI's effect decreases rapidly after the incentive is withdrawn[15] and that

174 behavior change is less likely to be sustained in the case of one-time HPFIs.[16] These results  
175 suggest that although health promotion interventions are associated with short-term behavioral  
176 changes, the long-term effects of such interventions require further investigation.

177 The current walking promotion program with an HPFI was conducted for 2 years and 6  
178 months, from April 2016 to March 2019. Although citizens were given incentives based on their  
179 daily step count, there was no penalty for not registering steps. Based on this design, it could be  
180 predicted that participants inevitably would register their steps less frequently as their interest in  
181 the program waned. As the total participation period depended on the registration start date, this  
182 study's analyses were limited to only 12 months from the registration start date. Of the  
183 participant sample, 86.4% registered their daily step count on more than 80% of the days in a  
184 year, which is considered a very high participation rate.

185 This study has some limitations. As the participants voluntarily chose to participate in the  
186 intervention, the results may not apply to the general population. Moreover, as the control group  
187 did not register a daily step count, it was impossible to determine whether any changes in their  
188 step count or medical expenses occurred during the study period.

## 189 **Conclusions**

190 These results suggest that a walking promotion program with an HPFI could help reduce  
191 healthcare costs. For incentive measures to work effectively, the rewards must be attractive to  
192 participants. If the rewards are too small, the incentive will not work. Conversely, the larger the  
193 rewards, the higher the program expenses will be as the rewards are paid to participants. This  
194 program's incentives were based on the HPFI guidelines from the MHLW as well as incentives  
195 granted by similar policies implemented in Japan. With program context differing widely from  
196 region to region and country to country, future investigations are needed to inform the selection

197 of appropriate incentive schemes for programs offered in other regions and countries.

198

199 **Acknowledgments**

200 We are grateful to Mr M Funatomi for his managing the project site.

201

202

## References

203

1. WHO. Global health risks. Available from:

204

[http://www.who.int/healthinfo/global\\_burden\\_disease/GlobalHealthRisks\\_report\\_full.pdf](http://www.who.int/healthinfo/global_burden_disease/GlobalHealthRisks_report_full.pdf);

205

2009; Available from the following.

206

2. Zhang J, Chaaban J. The economic cost of physical inactivity in China. *Prev Med.* 2013;56:

207

75–78.

208

3. Giles EL, Robalino S, McColl E, Sniehotta FF, Adams J. The effectiveness of financial

209

incentives for health behaviour change: systematic review and meta-analysis. *PLOS ONE.*

210

2014.

211

4. Bravata DM, Smith-Spangler C, Sundaram V, Gienger AL, Lin N, Lewis R, et al. Using

212

pedometers to increase physical activity and improve health: A systematic review. *J Am Med*

213

*Assoc.* 2007;298: 2296–2304.

214

5. Lubans DR, Morgan PJ, Tudor-Locke C. A systematic review of studies using pedometers to

215

promote physical activity among youth. *Prev Med.* 2009;48: 307–315.

216

6. Nagai M, Kuriyama S, Kakizaki M, Ohmori-Matsuda K, Sone T, Hozawa A, et al. Impact of

217

walking on life expectancy and lifetime medical expenditure: the Ohsaki Cohort Study. *BMJ*

218

*Open.* 2011;1.

219

7. Nakamura K, Okamura T, Kanda H, Hayakawa T, Okayama A, Ueshima H. The health

220

promotion Research Committee of the Shiga National Health Insurance Organizations 5.

221

Available from: <https://academic.oup.com/eurpub/article/17/5/424/535609>.

222

8. Basic policy on economic and fiscal management and reform 202. Available from:

223

[https://www5.cao.go.jp/keizai-shimon/kaigi/cabinet/2021/2021\\_basicpolicies\\_en.pdf](https://www5.cao.go.jp/keizai-shimon/kaigi/cabinet/2021/2021_basicpolicies_en.pdf).

- 224 9. Finkelstein EA, Brown DS, Brown DR, Buchner DM. A randomized study of financial  
225 incentives to increase physical activity among sedentary older adults. *Prev Med (Baltim)*.  
226 2008;47: 182–187.
- 227 10. Kato M, Goto A, Tanaka T, Sasaki S, Igata A, Noda M. Effects of walking on medical cost:  
228 A quantitative evaluation by simulation focusing on diabetes. *J Diabetes Investig*. 2013;4:  
229 667–672.
- 230 11. Wall J, Mhurchu N, Blakely T, Rodgers A, Wilton J. Effectiveness of monetary incentives in  
231 modifying dietary behavior: a review of randomized, controlled trials. *Nutr Rev*. 2006;64:  
232 518–531.
- 233 12. Jochelson K. Kicking bad habits. Paying the patient: improving health using financial  
234 incentives. In: *Kicking Bad Habits. Paying Patient: Improving Heal Using Financial*  
235 *Incentives*. 2007.
- 236 13. Crockett RA, Weinman J, Hankins M, Marteau T. Time orientation and health-related  
237 behaviour: measurement in general population samples. *Psychol Health*. 2009;24: 333–350.
- 238 14. Sutherland K, Christianson JB, Leatherman S. Impact of targeted financial incentives on  
239 personal health behavior: a review of the literature. *Med Care Res Rev*. 2008;65(6)  
240 Supplement.
- 241 15. Oliver A, Marteau TM, Ashcroft RE. Can financial carrots improve health? *J Health Serv*  
242 *Res Policy*. 2009;14: 1–2.
- 243 16. Petry NM. Contingency management treatments: controversies and challenges. *Addiction*.  
244 2010;105: 1507–1509.
- 245 17. Hajat C, Hasan A, Subel S, Noach A. The impact of short term incentives on physical  
246 activity in a UK behavioral incentives program. *npj Digit. Med*. 2019;2: 91.

- 247 18. Adams J, Giles EL, Robalino S, Mccoll E, Sniehotta FF. A systematic review of the use of  
248 financial incentives and penalties to encourage uptake of healthy behavior. 2012;1:51.
- 249 19. Paul-Ebhohimhen V, Avenell A. Systematic review of the use of financial incentives in  
250 treatments for obesity and overweight. *Obes Rev.* 2008;9: 355–367.
- 251 20. Cahill K, Perera R. Competitions and incentives for smoking cessation. *Cochrane Database*  
252 *Syst Rev.* 2011;4.
- 253 21. Rosenberg DE, Kerr J, Sallis JF, Norman GJ, Calfas K, Patrick K. Promoting walking  
254 Among older adults living in retirement communities. *J Aging Phys Act.* 2012;20: 379–394.

255  
256

Fig1 Distribution of percent of months participating the walking program after the initiation

medRxiv preprint doi: <https://doi.org/10.1101/2022.02.07.22270574>; this version posted February 8, 2022. The copyright holder for this preprint (which was not certified by peer review) is the author/funder, who has granted medRxiv a license to display the preprint in perpetuity. It is made available under a [CC-BY 4.0 International license](https://creativecommons.org/licenses/by/4.0/).

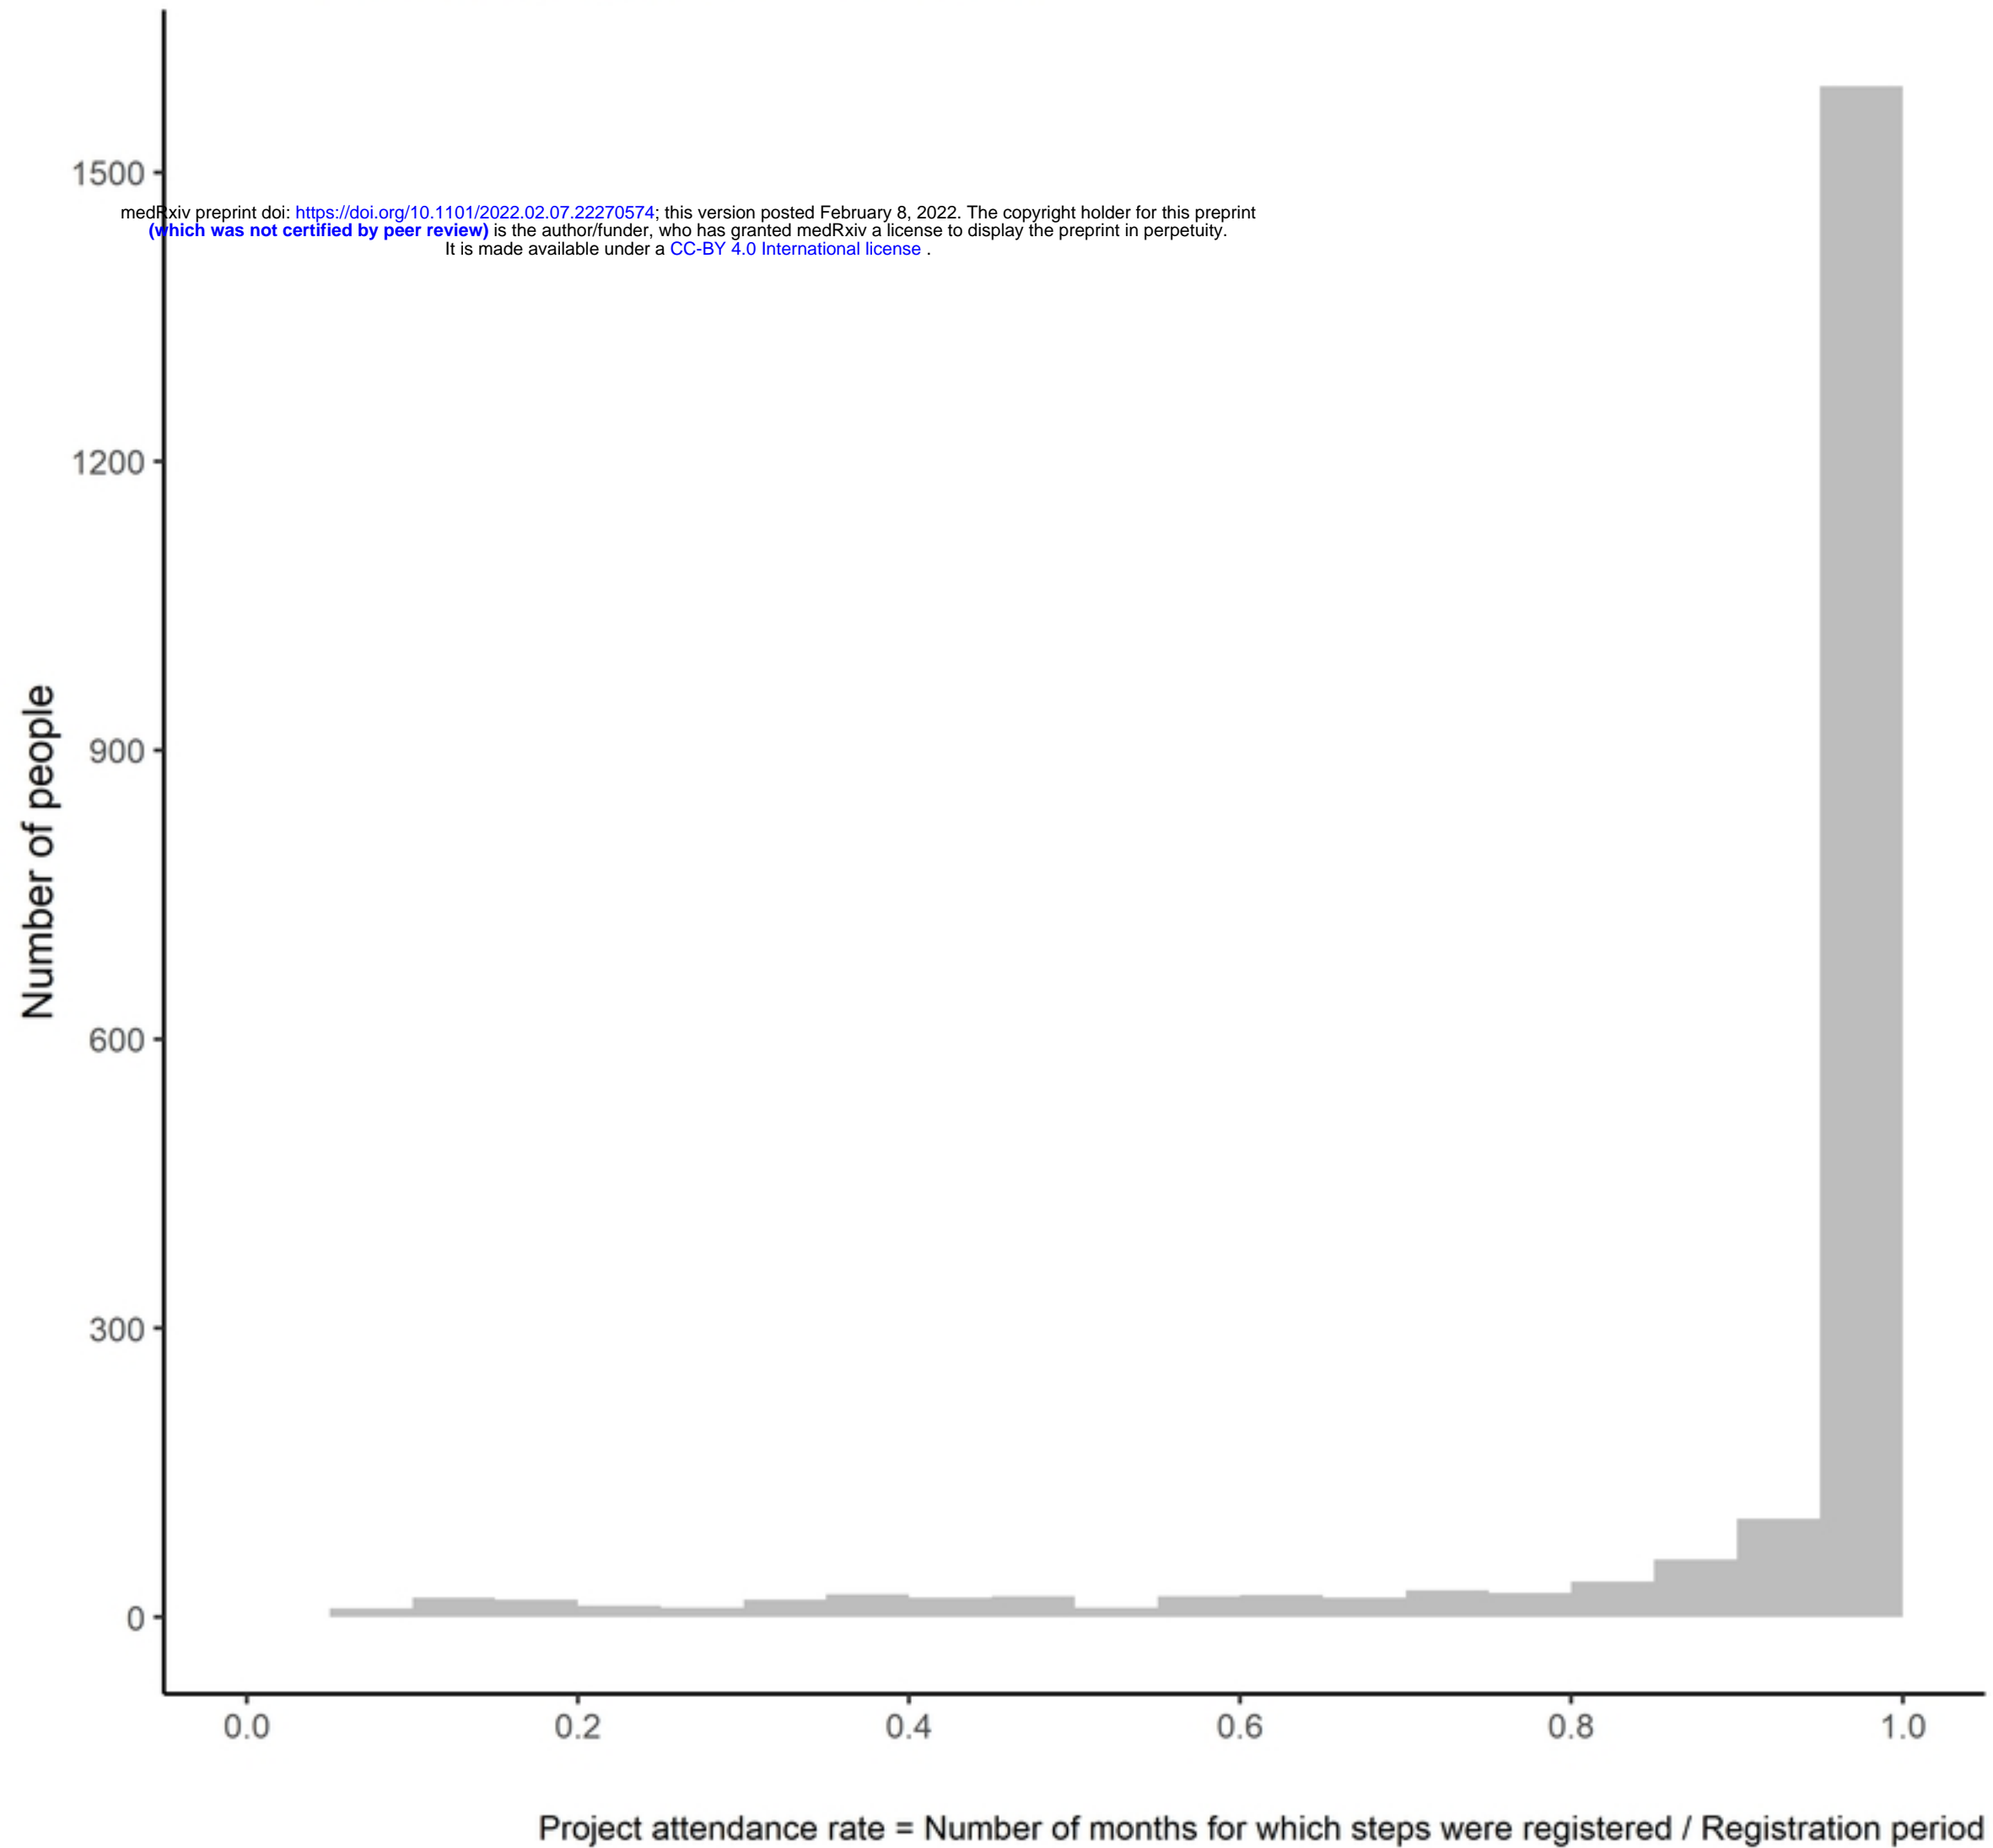

Figure 1

Fig2 Ordinal logistic analysis plot of the relationship  
between project participation and health care costs

medRxiv preprint doi: <https://doi.org/10.1101/2022.02.07.22270574>; this version posted February 8, 2022. The copyright holder for this preprint (which was not certified by peer review) is the author/funder, who has granted medRxiv a license to display the preprint in perpetuity. It is made available under a [CC-BY 4.0 International license](https://creativecommons.org/licenses/by/4.0/).

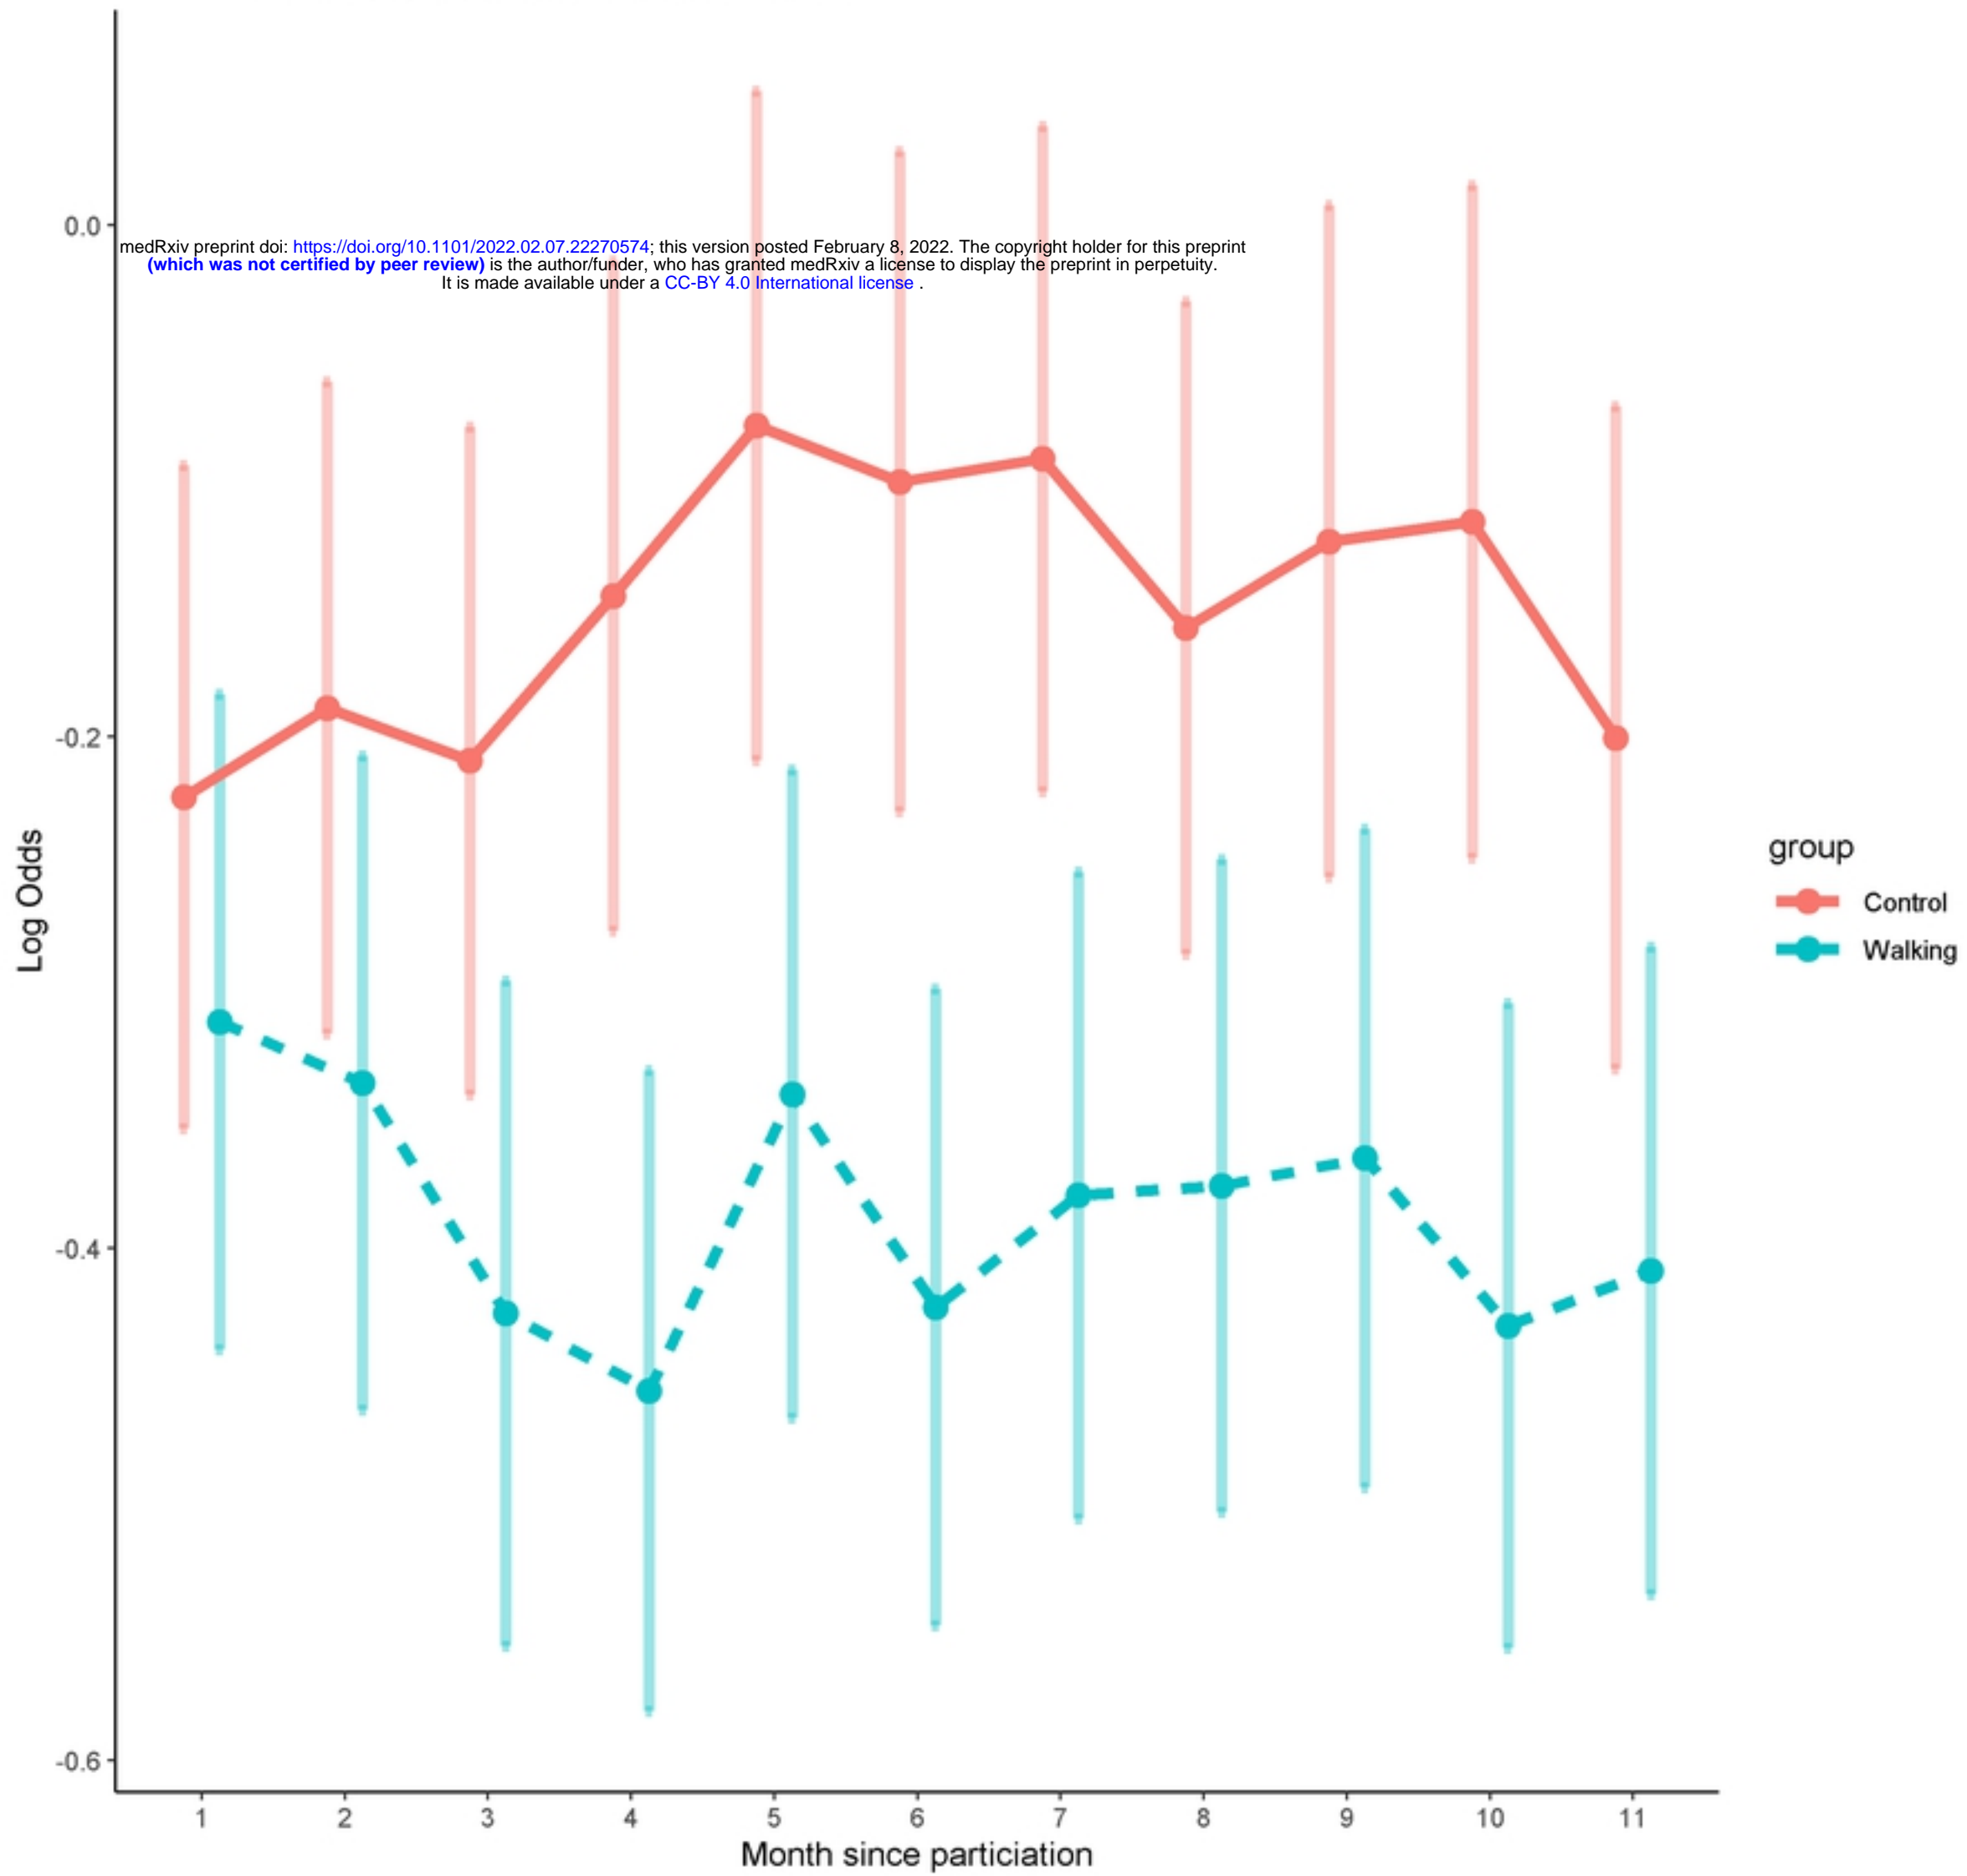

Figure2
